# Supplementary material for: Sex-specific structural and functional cardiac remodeling during healthy aging assessed by cardiovascular magnetic resonance
Source: Springer Nature journal article supplement (doi:10.1007/s00392-024-02430-5), 2024-03-11
Supplement: MOESM2 [file 26839944]

## **Supplementary methods 2**

### **Article title:**

Sex-specific structural and functional cardiac remodeling during healthy aging assessed by cardiovascular magnetic resonance.

### **Journal:**

Clinical Research in Cardiology

### **Authors:**

Leonhard Grassow<sup>a,b,c</sup>, Jan Gröschel<sup>a,b,c,d</sup>, Hadil Saad<sup>a,b,e</sup>, Leo Dyke Krüger<sup>a,b,c</sup>, Johanna Kuhnt<sup>a,b,c</sup>, Maximilian Müller<sup>a,b,c</sup>, Thomas Hadler<sup>a,b,c</sup>, Edyta Blaszczyk<sup>a,b,c</sup>, Jeanette Schulz-Menger<sup>a,b,c,e\*</sup>

### **Author affiliations:**

<sup>a</sup>Charité – Universitätsmedizin Berlin, corporate member of Freie Universität Berlin and Humboldt-Universität zu Berlin, ECRC Experimental and Clinical Research Center, Lindenberger Weg 80, 13125 Berlin, Germany

<sup>b</sup>Working Group on Cardiovascular Magnetic Resonance, Experimental and Clinical Research Center, a joint cooperation between Charité Medical Faculty and the Max-Delbrück Center for Molecular Medicine, Berlin, Germany

<sup>c</sup>DZHK (German Centre for Cardiovascular Research), partner site Berlin, Germany

<sup>d</sup>Deutsches Herzzentrum der Charité – Department of Cardiology, Angiology and Intensive Care Medicine, Charitéplatz 1, 10117 Berlin, Germany

<sup>e</sup>HELIOS Hospital Berlin-Buch, Department of Cardiology and Nephrology, Schwanebecker Chaussee 50, 13125 Berlin, Germany

### **\*Corresponding author:**

Univ.-Prof. Dr. med. Jeanette Schulz-Menger

E-Mail: [jeanette.schulz-menger@charite.de](mailto:jeanette.schulz-menger@charite.de)

Abbreviations:

CMR: Cardiovascular magnetic resonance

bSSFP: balanced steady-state free precession

LV: Left ventricle

RV: Right ventricle

**Supplementary methods 2 – Technical CMR sequence details:**

The analysis was performed using balanced steady-state free precession (bSSFP) CMR cine imaging acquisitions in a short-axis stack covering the whole LV and RV. Technical CMR sequence details varied as follows:

At 1.5 Tesla scanners (Avanto and AvantoFit, Siemens Healthineers, Erlangen, Germany): repetition time: 34.7 - 62 ms, echo time: 1.14 - 1.48 ms, flip angle: 70 - 80 degrees, fields of view: 255 - 308.75 x 340 - 380 mm<sup>2</sup>, matrix: 144 - 216 x 192 - 256, slice thickness and gap: 7 / 0 mm and 7 / 3 mm, 30 cardiac phases.

At 3 Tesla scanners (SkyraFit and Verio, Siemens Healthineers, Erlangen, Germany): repetition time: 3.1 - 45.78 ms, echo time: 1.3 - 1.43 ms, flip angle: 45 - 54 degrees, fields of view: 255 - 301.15 x 340 - 360 mm<sup>2</sup>, matrix: 156 - 174 x 192 - 208, slice thickness and gap: 7 / 0 mm, 6 / 0 mm and 7 / 3 mm, 30 cardiac phases.
