# Supplementary material for: Sex-specific structural and functional cardiac remodeling during healthy aging assessed by cardiovascular magnetic resonance
Source: Springer Nature journal article supplement (doi:10.1007/s00392-024-02430-5), 2024-03-11
Supplement: MOESM3 [file 26839944]

## **Supplementary results 1**

### Article title:

Sex-specific structural and functional cardiac remodeling during healthy aging assessed by cardiovascular magnetic resonance.

### Journal:

Clinical Research in Cardiology

### Authors:

Leonhard Grassow<sup>a,b,c</sup>, Jan Gröschel<sup>a,b,c,d</sup>, Hadil Saad<sup>a,b,e</sup>, Leo Dyke Krüger<sup>a,b,c</sup>, Johanna Kuhnt<sup>a,b,c</sup>, Maximilian Müller<sup>a,b,c</sup>, Thomas Hadler<sup>a,b,c</sup>, Edyta Blaszczyk<sup>a,b,c</sup>, Jeanette Schulz-Menger<sup>a,b,c,e\*</sup>

### Author affiliations:

<sup>a</sup>Charité – Universitätsmedizin Berlin, corporate member of Freie Universität Berlin and Humboldt-Universität zu Berlin, ECRC Experimental and Clinical Research Center, Lindenberger Weg 80, 13125 Berlin, Germany

<sup>b</sup>Working Group on Cardiovascular Magnetic Resonance, Experimental and Clinical Research Center, a joint cooperation between Charité Medical Faculty and the Max-Delbrück Center for Molecular Medicine, Berlin, Germany

<sup>c</sup>DZHK (German Centre for Cardiovascular Research), partner site Berlin, Germany

<sup>d</sup>Deutsches Herzzentrum der Charité – Department of Cardiology, Angiology and Intensive Care Medicine, Charitéplatz 1, 10117 Berlin, Germany

<sup>e</sup>HELIOS Hospital Berlin-Buch, Department of Cardiology and Nephrology, Schwanebecker Chaussee 50, 13125 Berlin, Germany

### \*Corresponding author:

Univ.-Prof. Dr. med. Jeanette Schulz-Menger

E-Mail: [jeanette.schulz-menger@charite.de](mailto:jeanette.schulz-menger@charite.de)

**Supplementary results 1 – Additional age-correlated left ventricular parameters:**

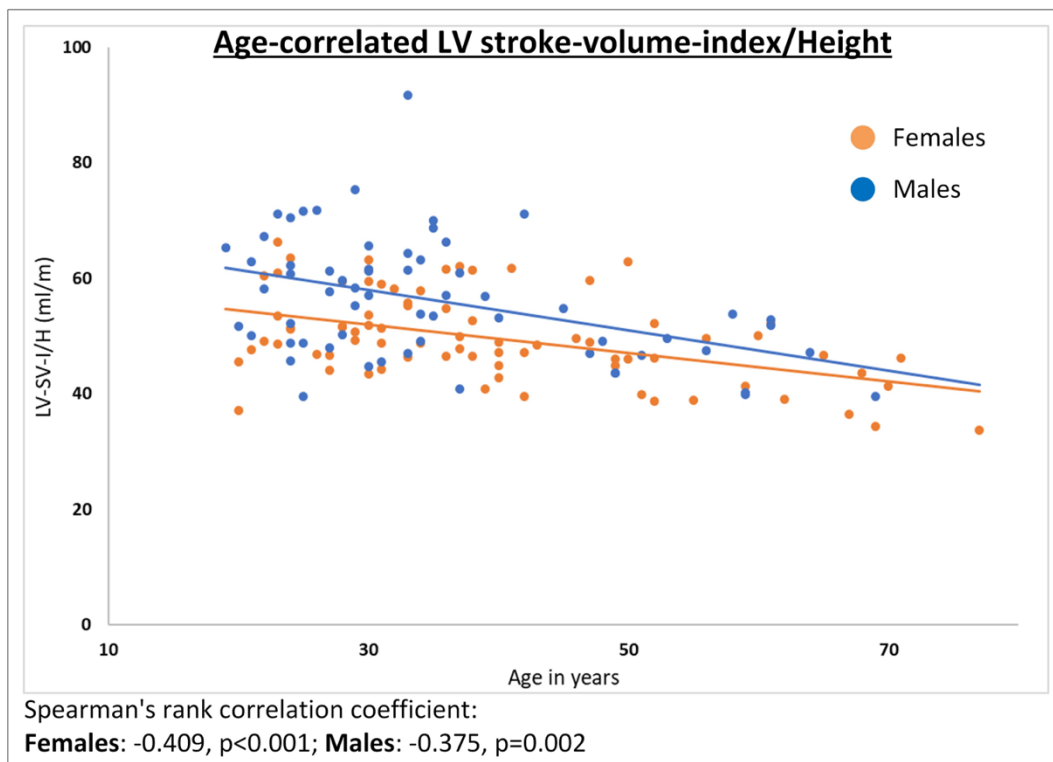

**Supplementary Fig. 2** Age-correlated development of LV stroke-volume-index/Height in women and men. Female graph: orange, male graph: blue. Abbreviations: H: Height, I: Index, LV: Left ventricle, SV: Stroke volume.

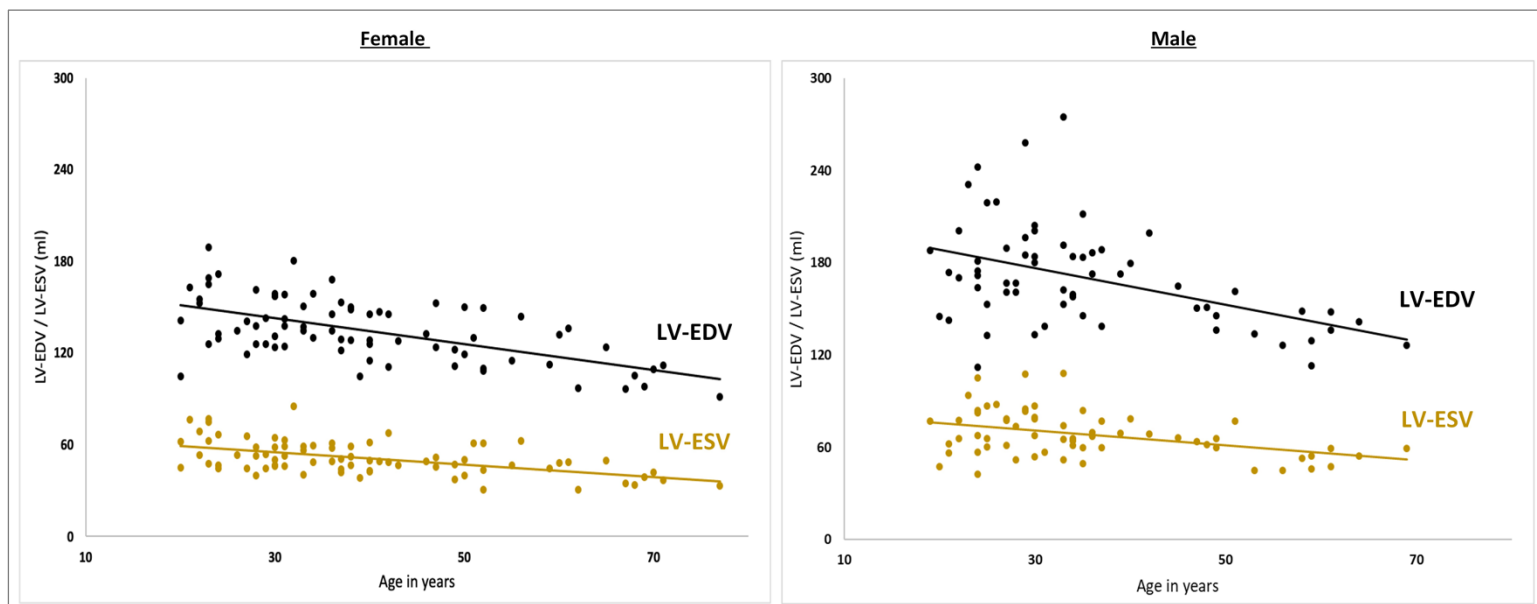

**Supplementary Fig. 3** Age-related development of LV end-systolic-volume (ocher) and end-diastolic-volume (black) in women (left) and men (right). Abbreviations: LV: Left ventricle, EDV: End-diastolic-volume, ESV: End-systolic-volume.
