# Supplementary material for: Sex-specific structural and functional cardiac remodeling during healthy aging assessed by cardiovascular magnetic resonance
Source: Springer Nature journal article supplement (doi:10.1007/s00392-024-02430-5), 2024-03-11
Supplement: MOESM4 [file 26839944]

## **Supplementary results 2**

### **Article title:**

Sex-specific structural and functional cardiac remodeling during healthy aging assessed by cardiovascular magnetic resonance.

### **Journal:**

Clinical Research in Cardiology

### **Authors:**

Leonhard Grassow<sup>a,b,c</sup>, Jan Gröschel<sup>a,b,c,d</sup>, Hadil Saad<sup>a,b,e</sup>, Leo Dyke Krüger<sup>a,b,c</sup>, Johanna Kuhnt<sup>a,b,c</sup>, Maximilian Müller<sup>a,b,c</sup>, Thomas Hadler<sup>a,b,c</sup>, Edyta Blaszczyk<sup>a,b,c</sup>, Jeanette Schulz-Menger<sup>a,b,c,e\*</sup>

### **Author affiliations:**

<sup>a</sup>Charité – Universitätsmedizin Berlin, corporate member of Freie Universität Berlin and Humboldt-Universität zu Berlin, ECRC Experimental and Clinical Research Center, Lindenberger Weg 80, 13125 Berlin, Germany

<sup>b</sup>Working Group on Cardiovascular Magnetic Resonance, Experimental and Clinical Research Center, a joint cooperation between Charité Medical Faculty and the Max-Delbrück Center for Molecular Medicine, Berlin, Germany

<sup>c</sup>DZHK (German Centre for Cardiovascular Research), partner site Berlin, Germany

<sup>d</sup>Deutsches Herzzentrum der Charité – Department of Cardiology, Angiology and Intensive Care Medicine, Charitéplatz 1, 10117 Berlin, Germany

<sup>e</sup>HELIOS Hospital Berlin-Buch, Department of Cardiology and Nephrology, Schwanebecker Chaussee 50, 13125 Berlin, Germany

### **\*Corresponding author:**

Univ.-Prof. Dr. med. Jeanette Schulz-Menger

E-Mail: [jeanette.schulz-menger@charite.de](mailto:jeanette.schulz-menger@charite.de)

Abbreviations:

LV-EDV: Left ventricular end-diastolic-volume

LV-EF: Left ventricular ejection fraction

LV-SV: Left ventricular stroke volume

RV-EDV: Right ventricular end-diastolic-volume

RV-EF: Right ventricular ejection fraction

RV-SV: Right ventricular stroke volume

**Supplementary results 2 – Intra- and interobserver variability:**

The mean deviations  $\pm$  standard deviations (SD) for intra- and interobserver variability were as follows:

*Intraobserver analysis:*

LV-EDV (ml):  $-0.48 \pm 4.00$ ; RV-EDV (ml):  $1.18 \pm 2.52$ ; LVEF (%):  $0.14 \pm 1.75$ ; RVEF (%):  $0.29 \pm 1.44$ ; LV-SV (ml):  $-0.19 \pm 3.26$ ; RV-SV (ml):  $1.18 \pm 2.46$ .

*Interobserver analysis:*

LV-EDV (ml):  $-1.23 \pm 4.64$ ; RV-EDV (ml):  $1.28 \pm 7.96$ ; LVEF (%):  $-2.55 \pm 3.00$ ; RVEF (%):  $-1.46 \pm 3.00$ ; LV-SV (ml):  $-4.67 \pm 4.68$ ; RV-SV (ml):  $-1.66 \pm 6.61$ .
